# Supplementary material for: Synthesis and biological activity of cymantrene and cyrhetrene 4-aminoquinoline conjugates against malaria, leishmaniasis, and trypanosomiasis
Source: Royal Society of Chemistry journal article supplement (doi:10.1039/c2dt30077j), 2012-01-01
Supplement: c2dt30077j.pdf [file c2dt30077j.pdf]

Dalton Transactions

**Synthesis and biological activity of cymantrene and cyrhetrene  
4-aminoquinoline conjugates against malaria, leishmaniasis,  
and trypanosomiasis†**

**SUPPLEMENTARY MATERIAL**

Lotta Glans<sup>a</sup>, Wanning Hu<sup>b</sup>, Christian Jöst<sup>a</sup>, Carmen de Kock<sup>c</sup>, Peter J. Smith<sup>c</sup>, Matti Haukka<sup>d</sup>, Heike Bruhn<sup>e</sup>, Ulrich Schatzschneider<sup>b\*</sup>, and Ebbe Nordlander<sup>a\*</sup>

<sup>a</sup> *Inorganic Chemistry Research Group, Chemical Physics, Center for Chemistry and Chemical Engineering, Lund University, Box 124, SE-221 00 Lund, Sweden*

<sup>b</sup> *Institut für Anorganische Chemie, Julius-Maximilians-Universität Würzburg, Am Hubland, D-97074 Würzburg, Germany*

<sup>c</sup> *Division of Pharmacology, Department of Medicine, University of Cape Town Medical School, Observatory 7925, South Africa*

<sup>d</sup> *Department of Chemistry, University of Eastern Finland, Box 111, FIN-80101 Joensuu, Finland*

<sup>e</sup> *Institut für Molekulare Infektionsbiologie, Julius-Maximilians-Universität Würzburg, Josef-Schneider-Str. 2 D15, D-97080 Würzburg, Germany*

\* Corresponding authors: E-mail: Ebbe.Nordlander@chemphys.lu.se; Tel: +46 46 222 8118; Fax: +46 46 222 4119; ulrich.schatzschneider@uni-wuerzburg.de; Tel: +49 931 31 83636; Fax: +49 931 31 84605.

**Table S1.** Crystallographic parameters for *N*-(7-chloroquinolin-4-yl)-*N'*-(cymantrenylmethyl)ethane-1,2-diamine·2H<sub>2</sub>O (**6**·2H<sub>2</sub>O).

| <b>6</b>                                   |                                                                   |
|--------------------------------------------|-------------------------------------------------------------------|
| Empirical formula                          | C <sub>20</sub> H <sub>21</sub> ClMnN <sub>3</sub> O <sub>5</sub> |
| Formula weight                             | 473.79                                                            |
| temp (K)                                   | 100(2)                                                            |
| $\lambda$ (Å)                              | 0.71073                                                           |
| cryst syst                                 | Monoclinic                                                        |
| space group                                | P2 <sub>1</sub> /n                                                |
| <i>a</i> (Å)                               | 14.7914(2)                                                        |
| <i>b</i> (Å)                               | 6.80990(10)                                                       |
| <i>c</i> (Å)                               | 20.2659(3)                                                        |
| $\beta$ (°)                                | 99.1560(10)                                                       |
| <i>V</i> (Å <sup>3</sup> )                 | 2015.33(5)                                                        |
| <i>Z</i>                                   | 4                                                                 |
| $\rho_{\text{calc}}$ (Mg/m <sup>3</sup> )  | 1.562                                                             |
| $\mu$ (Mo K $\alpha$ ) (mm <sup>-1</sup> ) | 0.826                                                             |
| No. reflections                            | 62133                                                             |
| Unique reflections                         | 4990                                                              |
| GOOF (F <sup>2</sup> )                     | 1.024                                                             |
| R <sub>int</sub>                           | 0.0410                                                            |
| R1 <sup>a</sup> ( <i>I</i> ≥ 2 $\sigma$ )  | 0.0310                                                            |
| wR2 <sup>b</sup> ( <i>I</i> ≥ 2 $\sigma$ ) | 0.0783                                                            |

<sup>a</sup>  $R1 = \Sigma||F_o| - |F_c||/\Sigma|F_o|$ . <sup>b</sup>  $wR2 = [\Sigma[w(F_o^2 - F_c^2)^2]/\Sigma[w(F_o^2)^2]]^{1/2}$ .
